# Supplementary material for: Effect of sport on health in people aged 60 years and older: a systematic review with meta-analysis
Source: HighWire-hosted journal article supplement (doi:10.1136/bjsports-2022-105820), 2022-11-30

**Supplementary Figure 1** Funnel plot of standard error by Hedges'g for trials included in the meta-analysis for strength and physical function. Each circle represents one trial.

**a) Strength (Egger's test p-value= 0.59)**

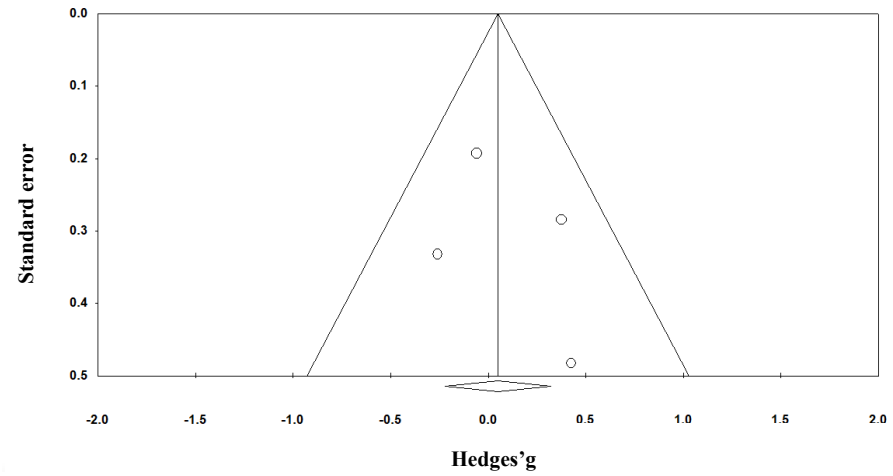

**b) Physical function (Egger's test p-value= 0.11)**

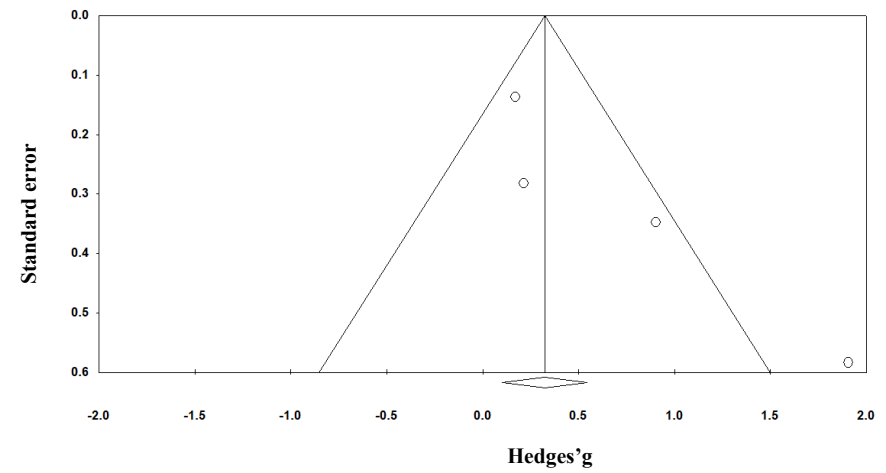

Supplement: bjsports-2022-105820supp006_data_supplement.pdf [file bjsports-2022-105820supp006_data_supplement.pdf]
