# Supplementary material for: Effect of sport on health in people aged 60 years and older: a systematic review with meta-analysis
Source: HighWire-hosted journal article supplement (doi:10.1136/bjsports-2022-105820), 2022-11-30

**Supplementary Figure 2** Funnel plot of standard error by difference in means for trials included in the meta-analysis for cardiorespiratory fitness, body composition and bone mineral density. Each circle represents one trial.

**a) Cardiorespiratory fitness (Egger's test p-value= 0.27)**

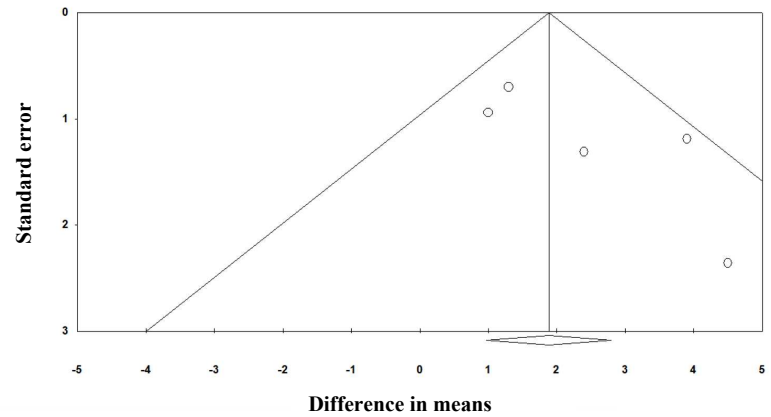

**b) Fat mass (Egger's test p-value= 0.28)**

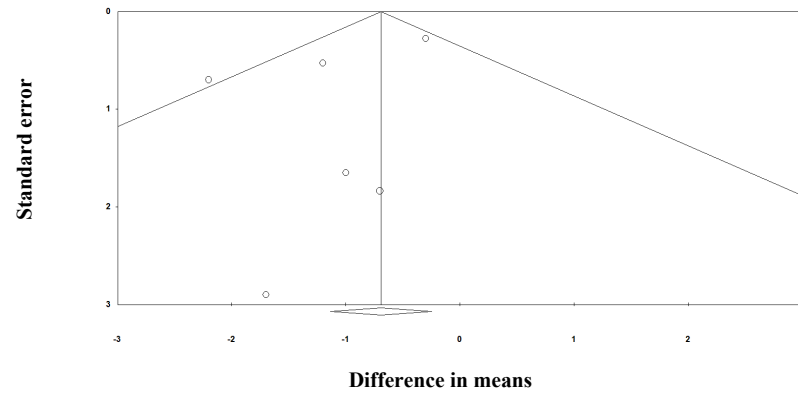

**c) Lean mass (Egger's test p-value= 0.32)**

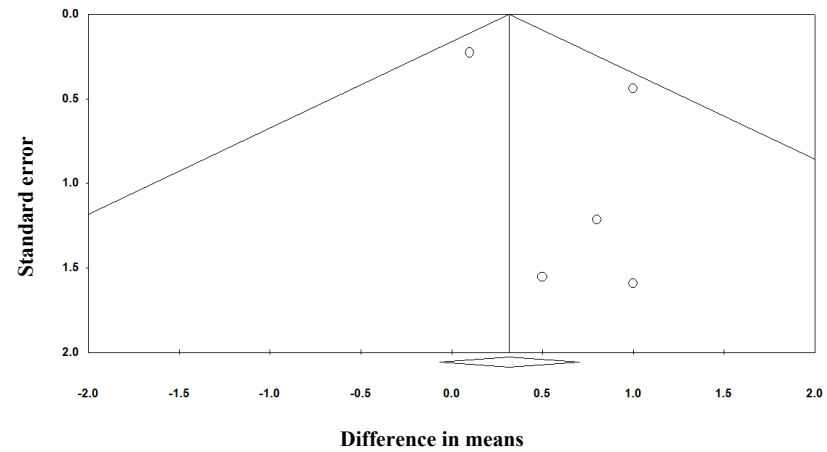

**d) Bone mineral density (Egger's test p-value= 0.02)**

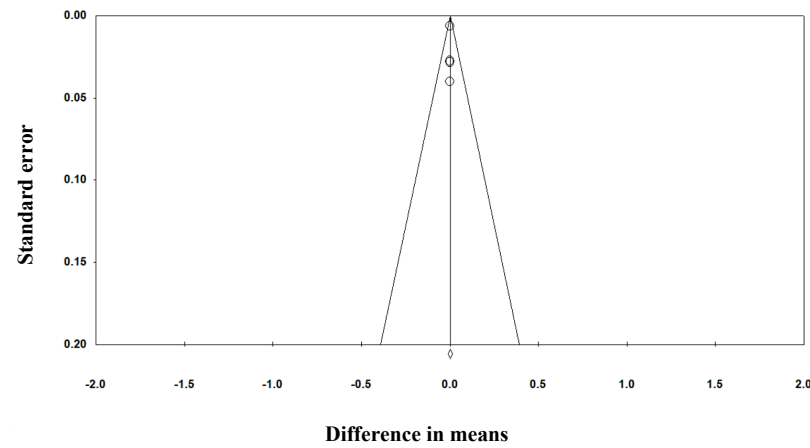

Supplement: bjsports-2022-105820supp007_data_supplement.pdf [file bjsports-2022-105820supp007_data_supplement.pdf]
